# Supplementary material for: Circulating lipids uncover early membrane disruption as a primary event preceding Alzheimer’s disease onset
Source: Research Square preprint supplement (doi:10.21203/rs.3.rs-9357482/v1), 2026-04-28

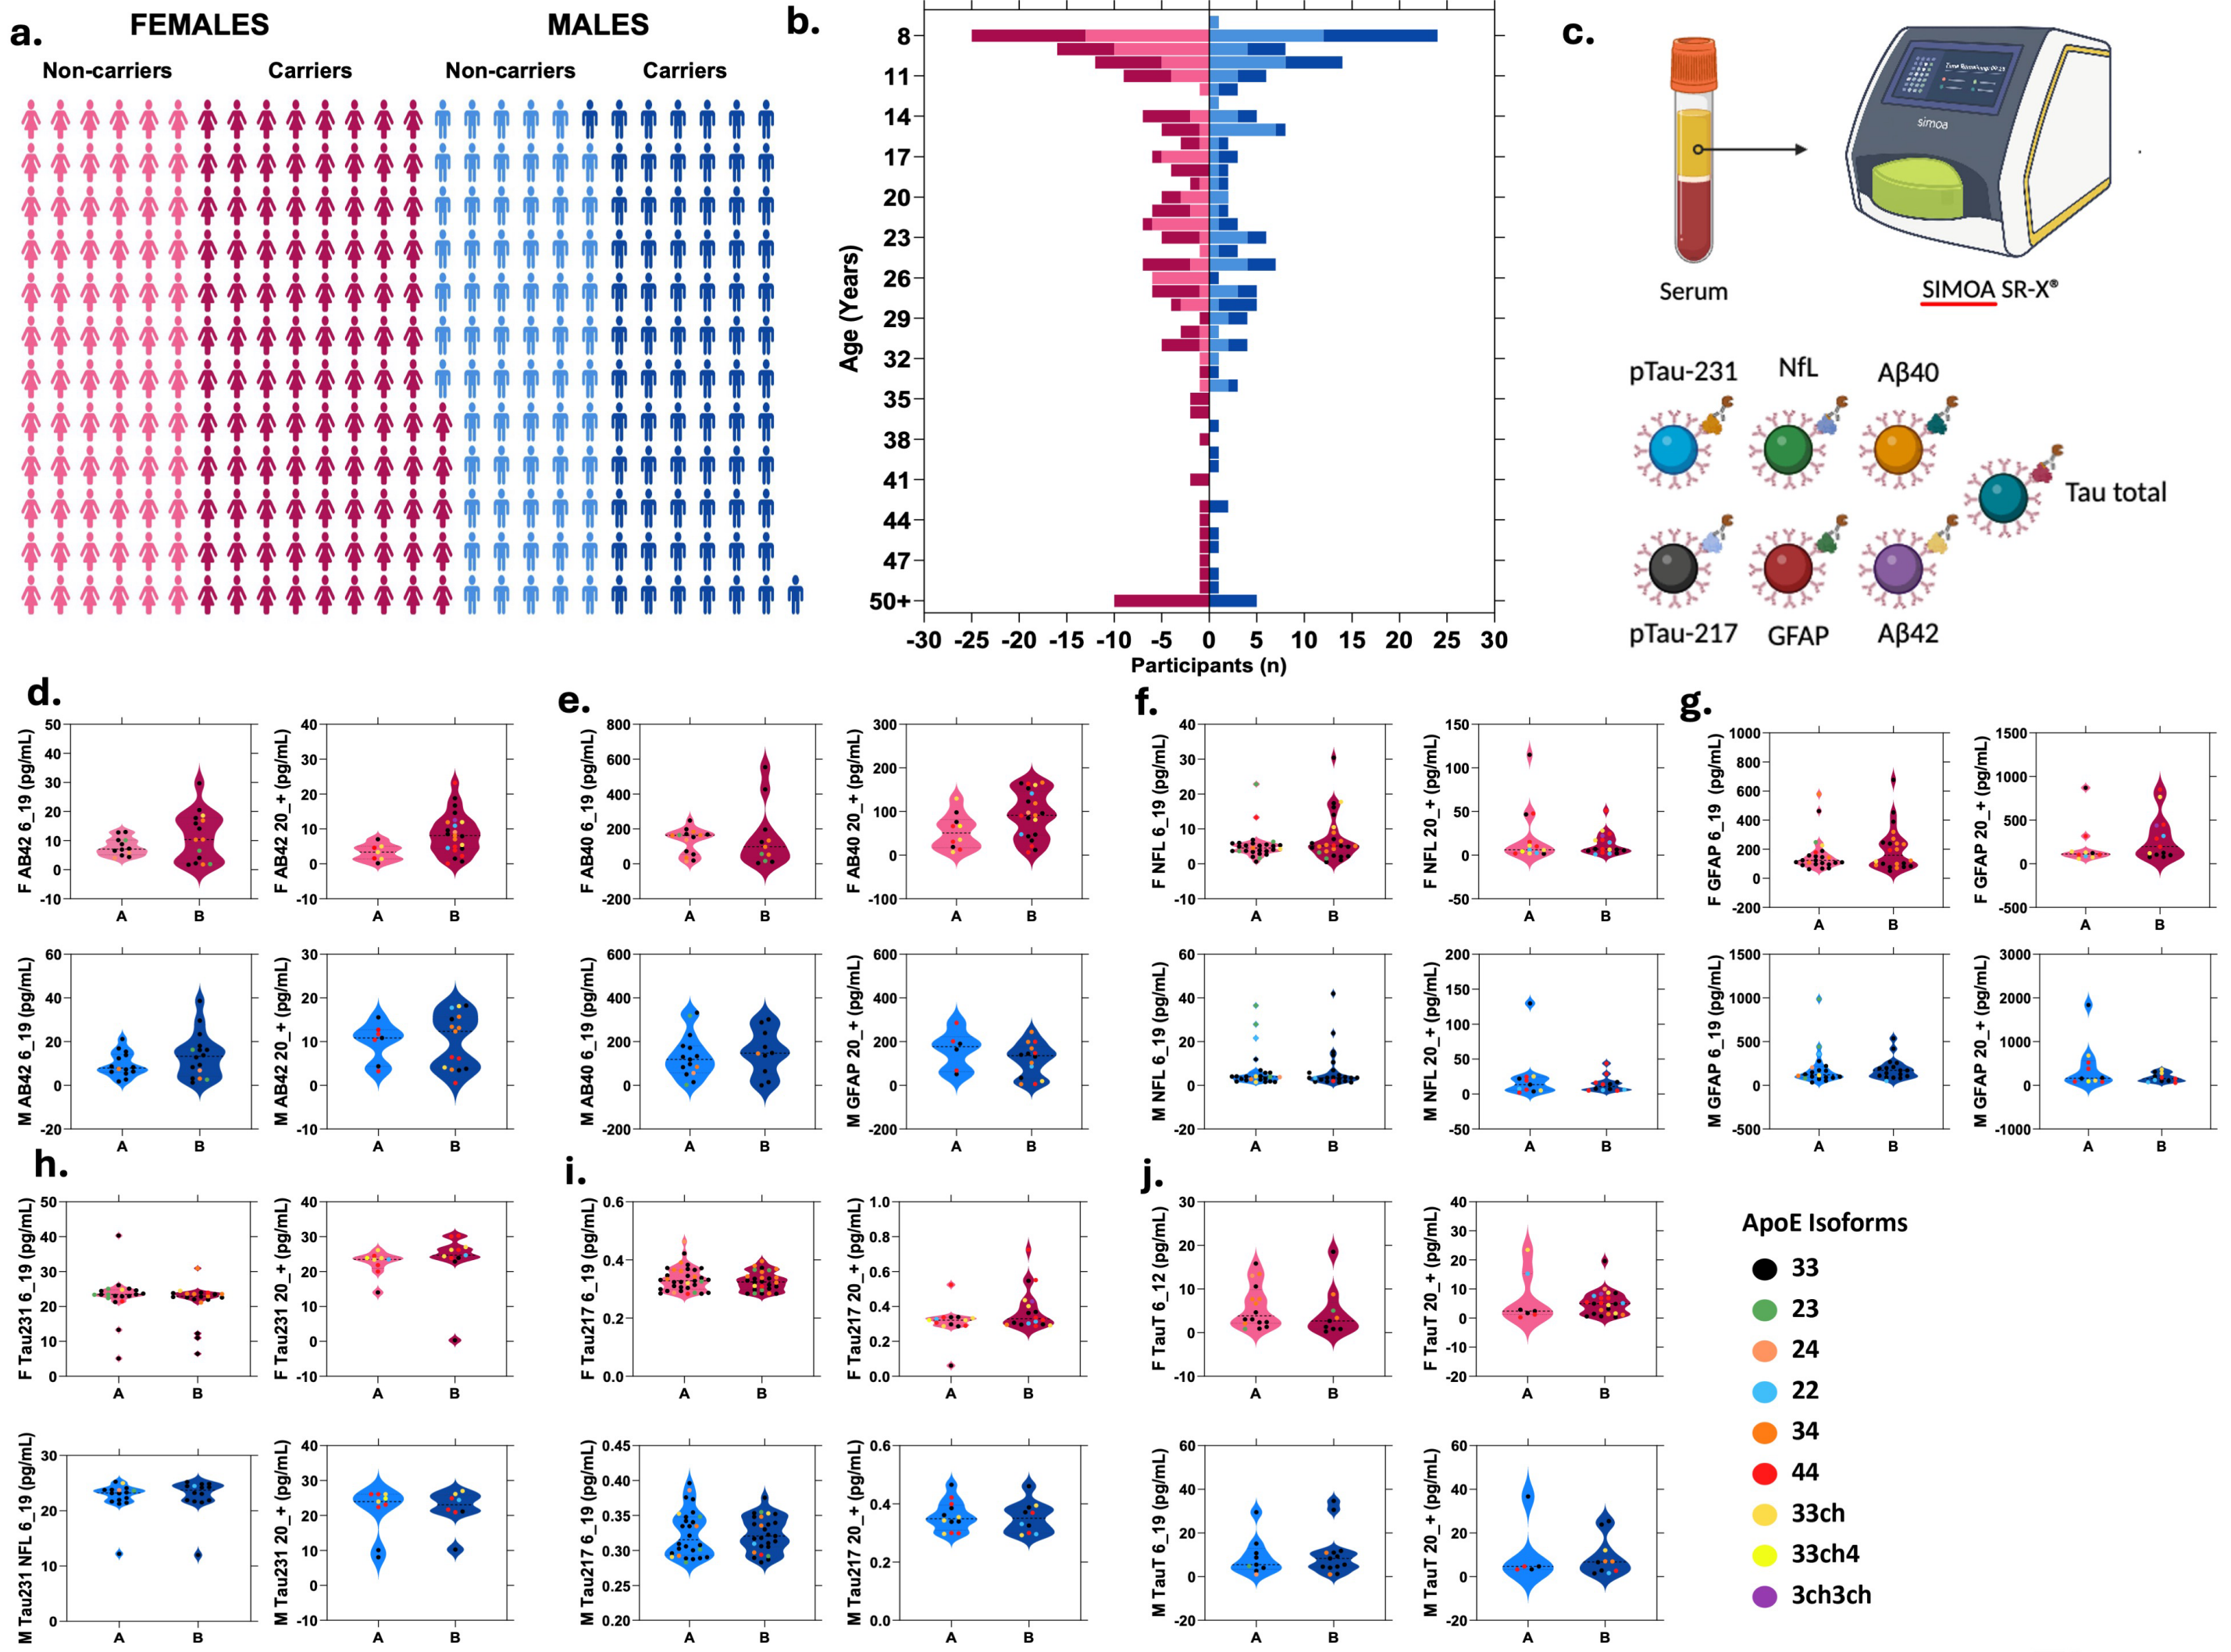

**Figure 1**

# NEUTRAL LIPIDS

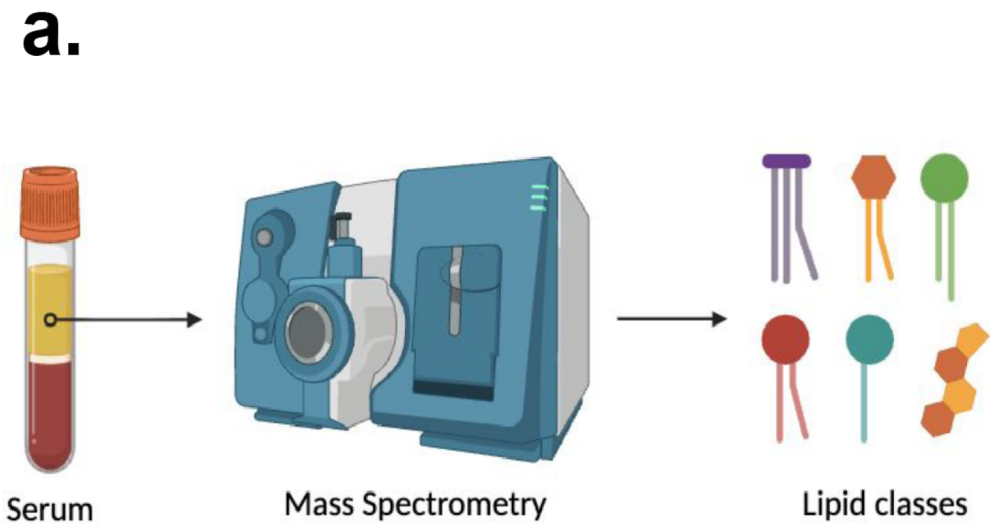

**b.**

| NEUTRAL LIPIDS                    |         |
|-----------------------------------|---------|
| <b>Cholesterol-related lipids</b> |         |
| Free cholesterol                  | FC      |
| Cholesteryl ester                 | CE      |
| <b>Acyl-CoA derivatives</b>       |         |
| Acyl-CoA                          | AC      |
| <b>Glycerolipids</b>              |         |
| Monoacylglycerols                 | MG      |
| Diacylglycerols                   | DG      |
| Triacylglycerols                  | TG      |
| <b>Glycerophospholipids</b>       |         |
| Phosphatidic acid                 | PA      |
| Phosphatidylglycerol              | PG      |
| Phosphatidylinositol              | PI      |
| Phosphatidylserine                | PS      |
| Phosphatidylethanolamine          | PE      |
| Phosphatidylcholine               | PC      |
| Bis(monoacylglycerol)phosphate    | BMP     |
| Acyl-phosphatidylglycerol         | AcylIPG |
| N-acyl-phosphatidylethanolamine   | NAPE    |
| N-acyl-phosphatidylserine         | NAPS    |
| <b>Plasmalogens</b>               |         |
| Plasmenyl-PE (PE plasmalogen)     | PEp     |
| Plasmenyl-PC (PC plasmalogen)     | PCe     |
| <b>Lysophospholipids</b>          |         |
| Lysophosphatidylserine            | LPS     |
| Lysophosphatidylinositol          | LPI     |
| Lysophosphatidylethanolamine      | LPE     |
| Lysophosphatidylcholine           | LPC     |
| Lysoplasmalogen-PE                | LPEp    |
| Lysoplasmalogen-PC                | LPCe    |
| <b>Sphingolipids</b>              |         |
| Ceramide                          | Cer     |
| Dihydroceramide                   | dhCer   |
| Sphingomyelin                     | SM      |
| Dihydrosphingomyelin              | dhSM    |
| Monohexosylceramide               | MhCer   |
| Lactosylceramide                  | LacCer  |
| GM3 ganglioside                   | GM3     |

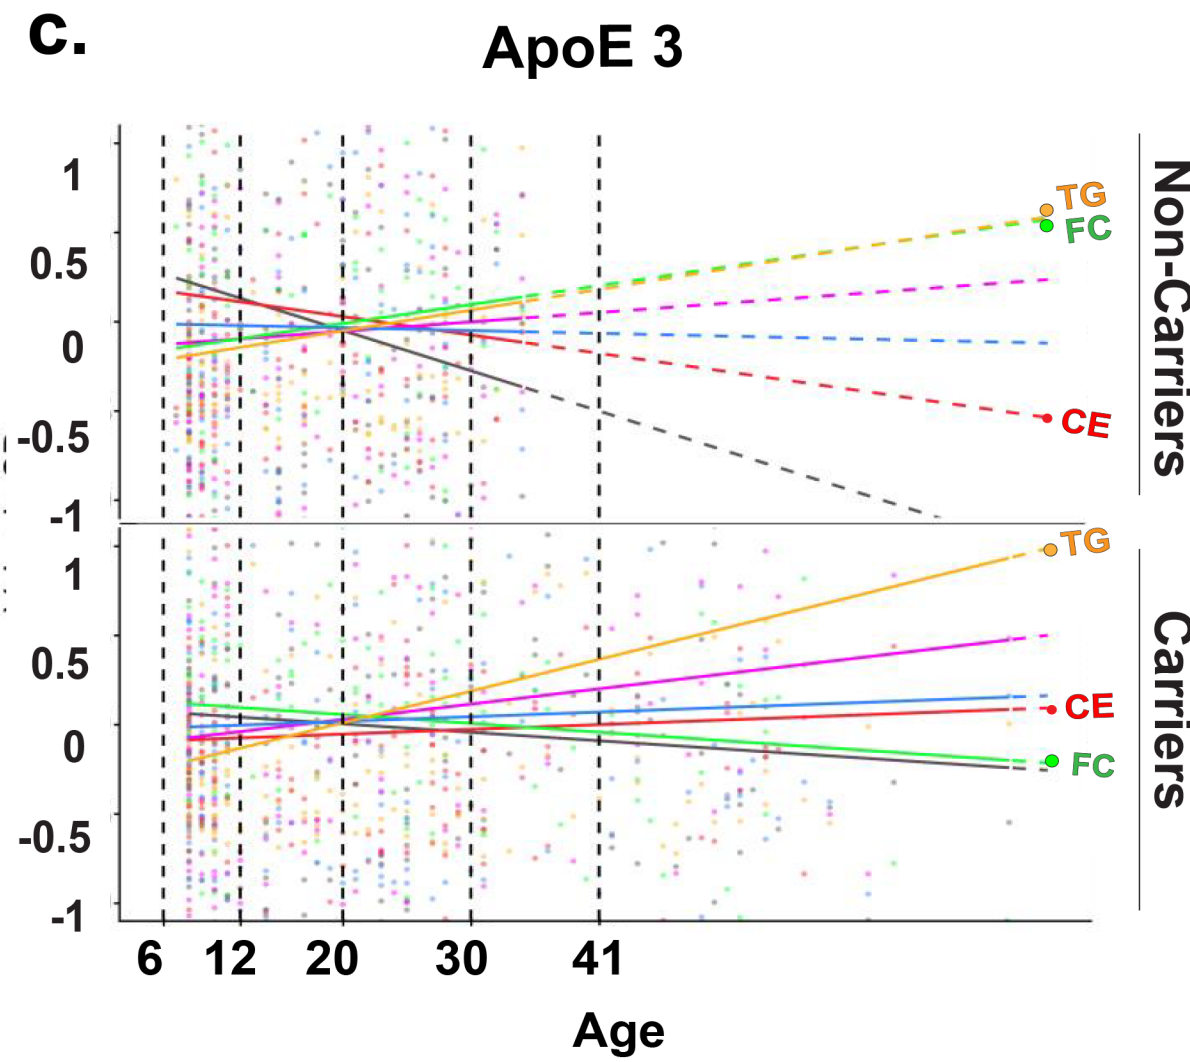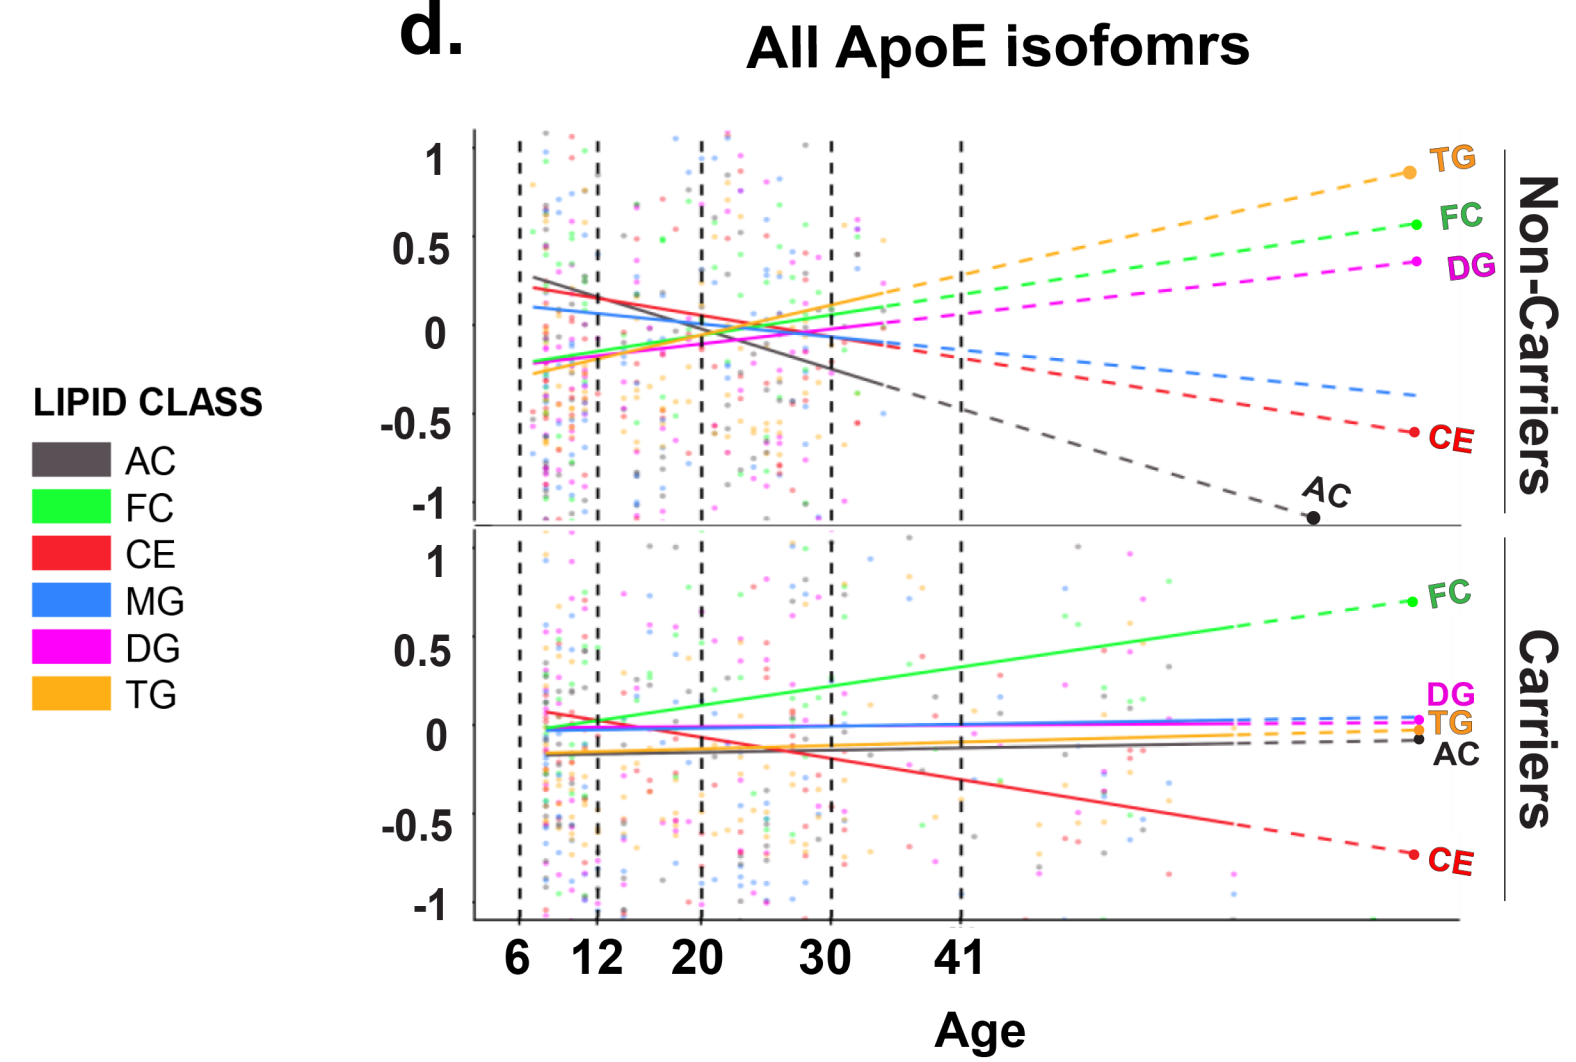

# SPHINGOLIPIDS

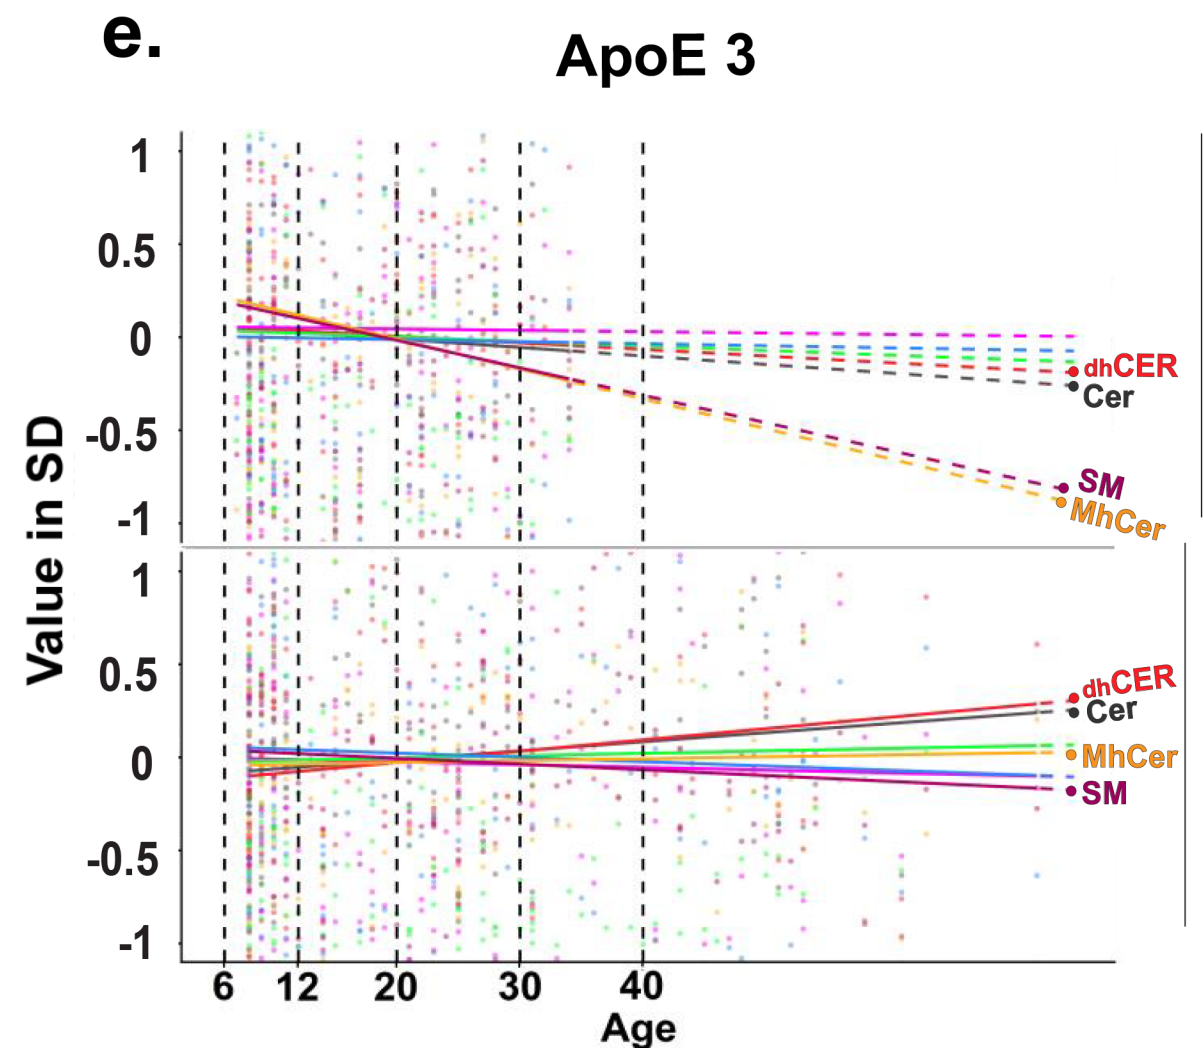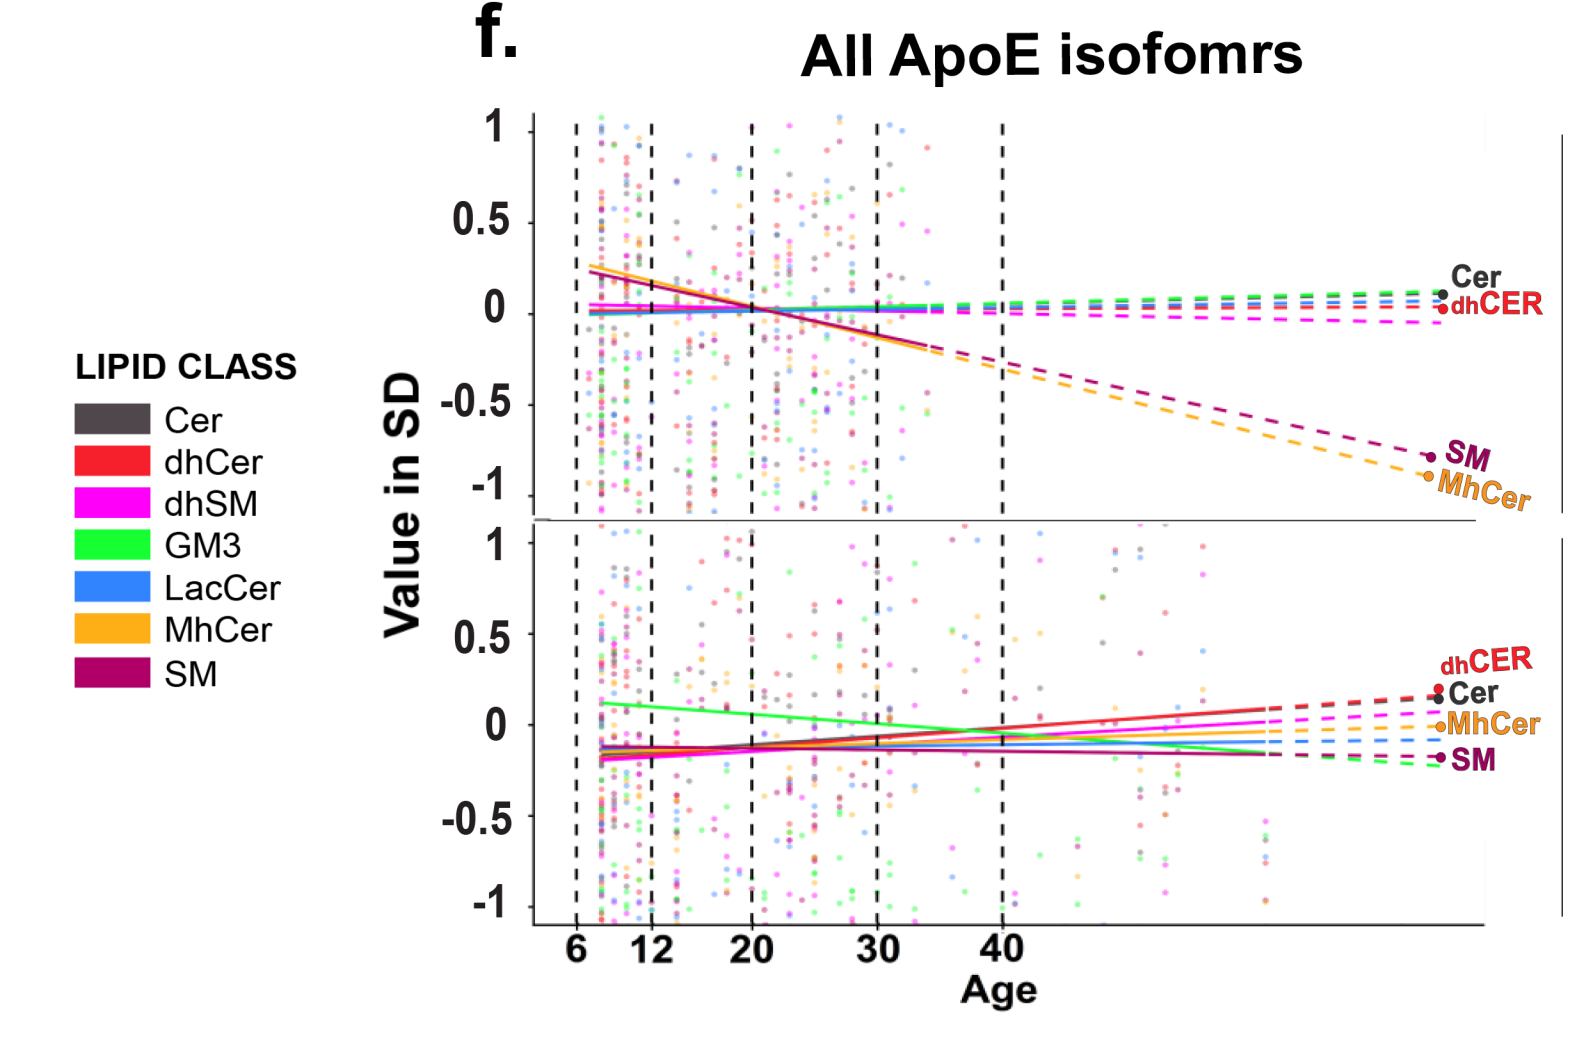

**a.**

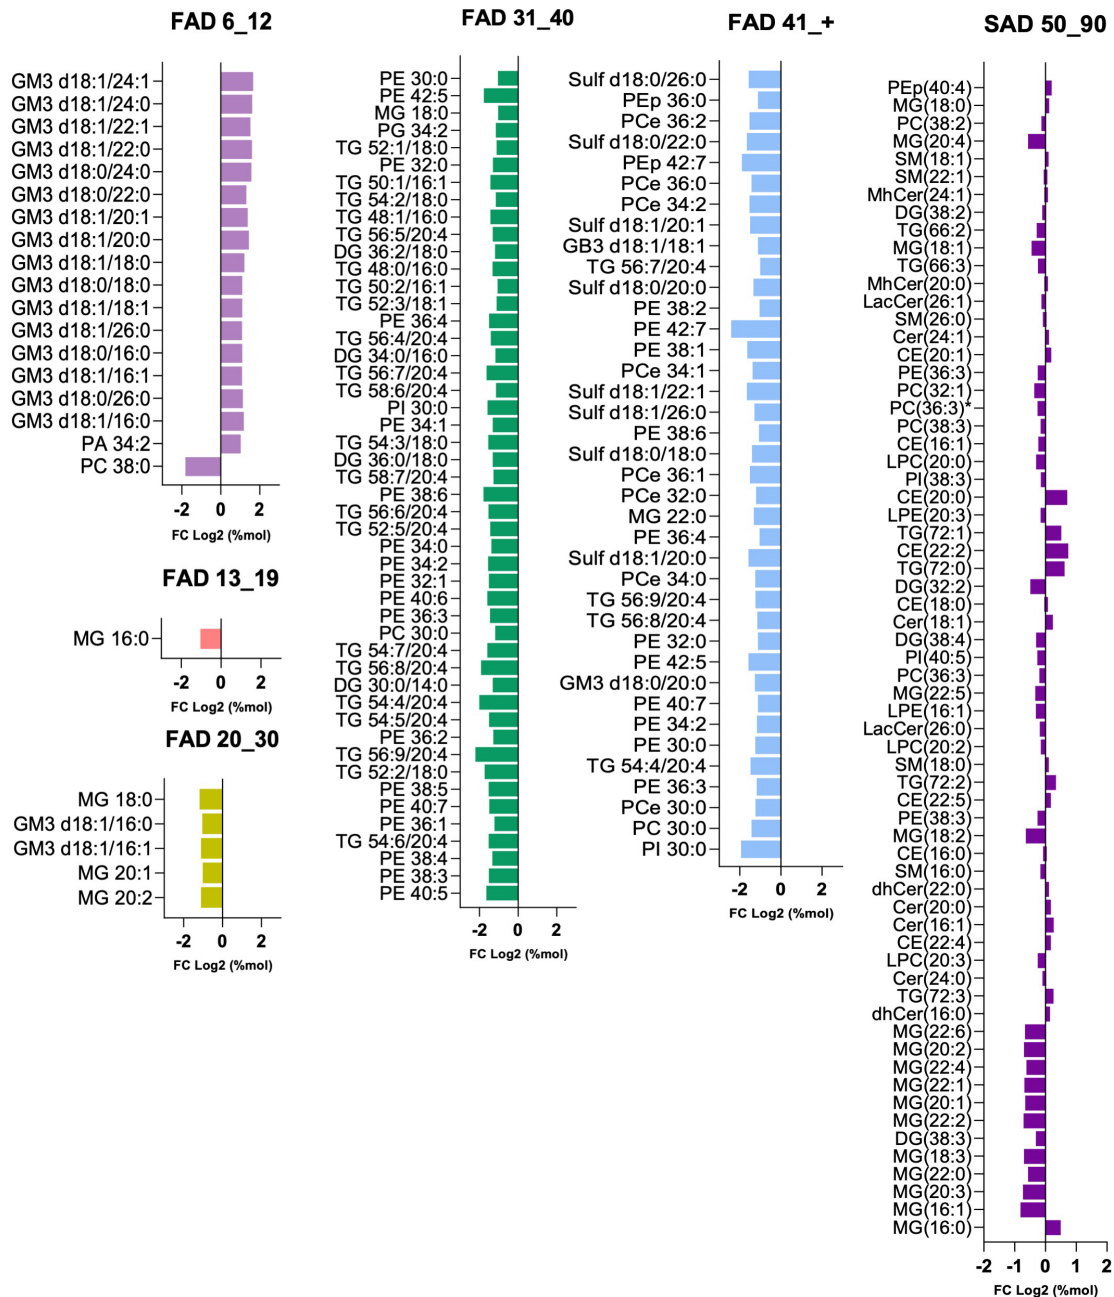

**b.**

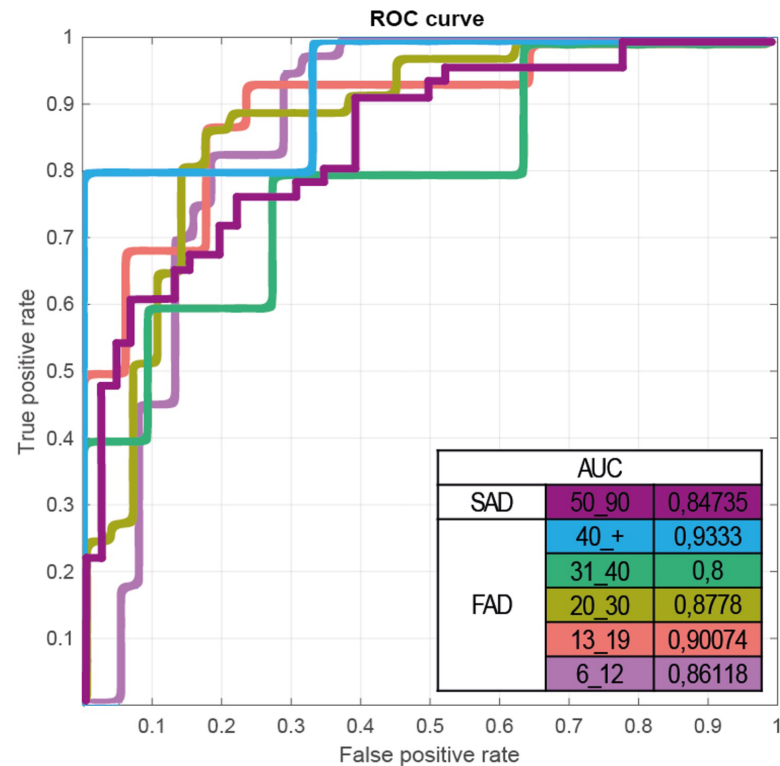

**a.****ApoE 3**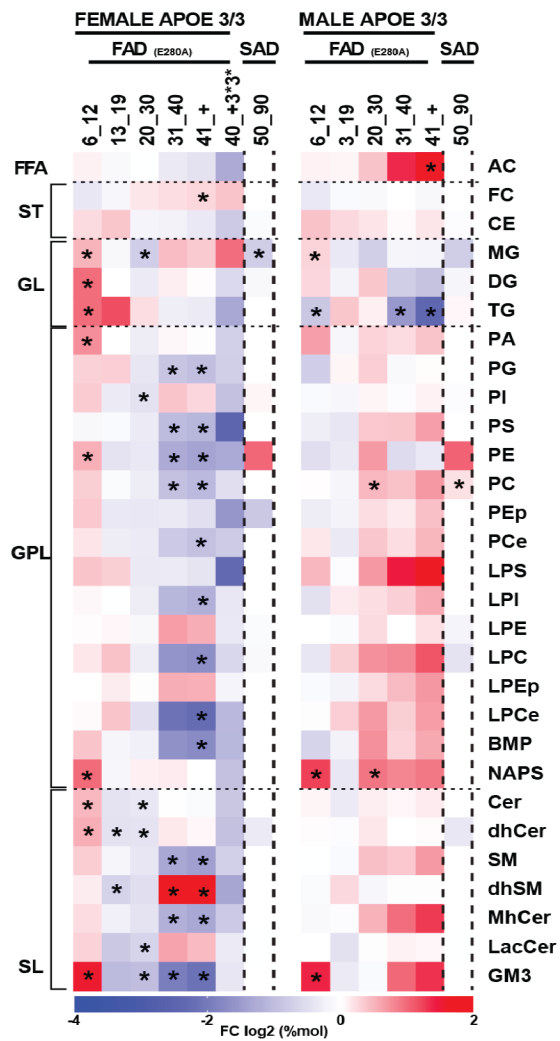**c.**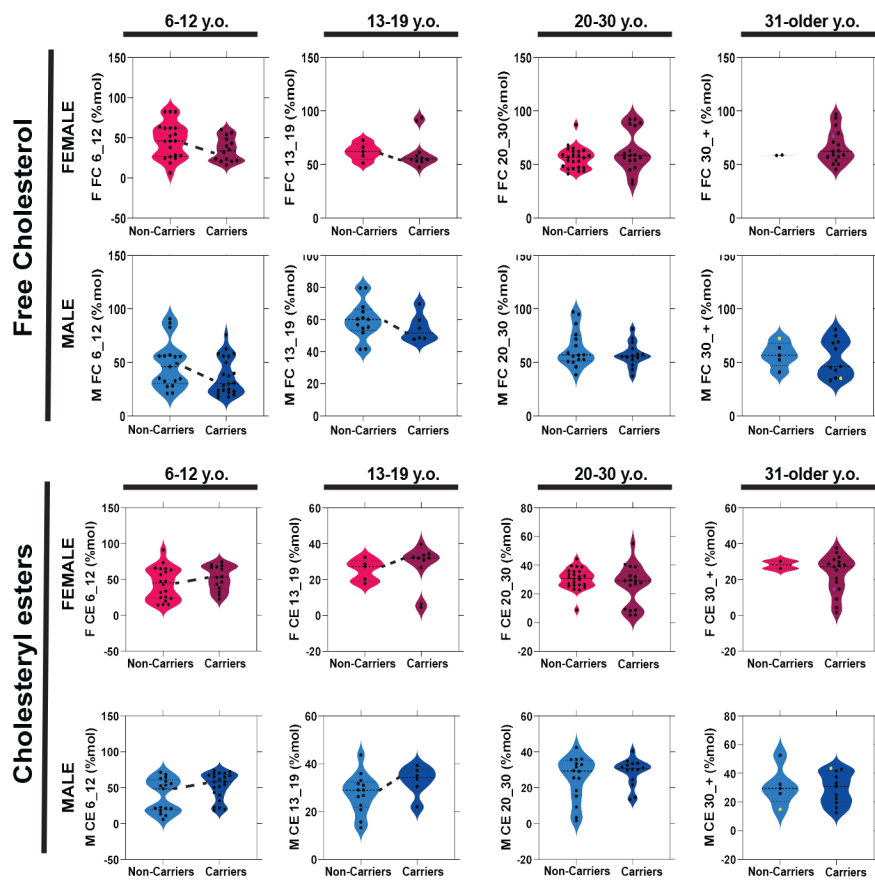**b.**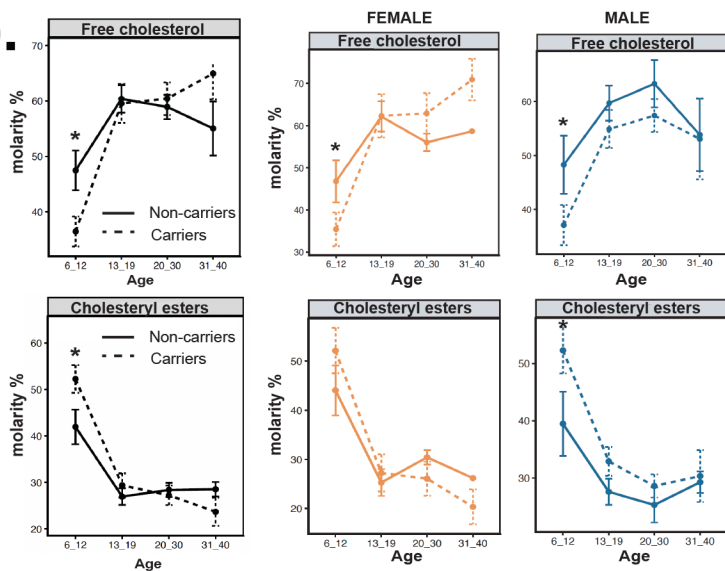**d.**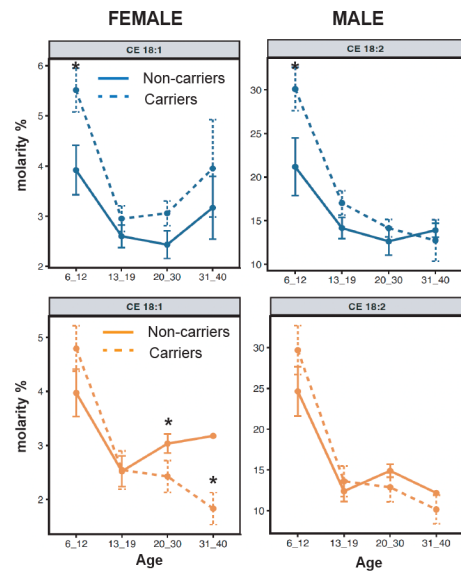

**a.** Children 6-12 y.o.

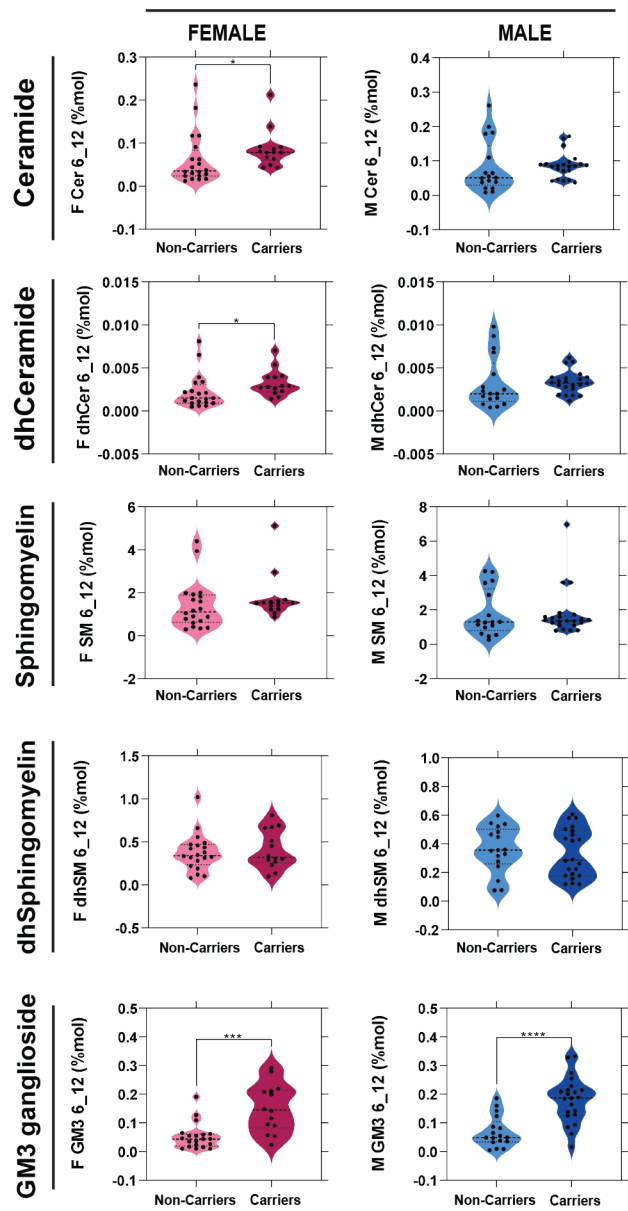

**b.**

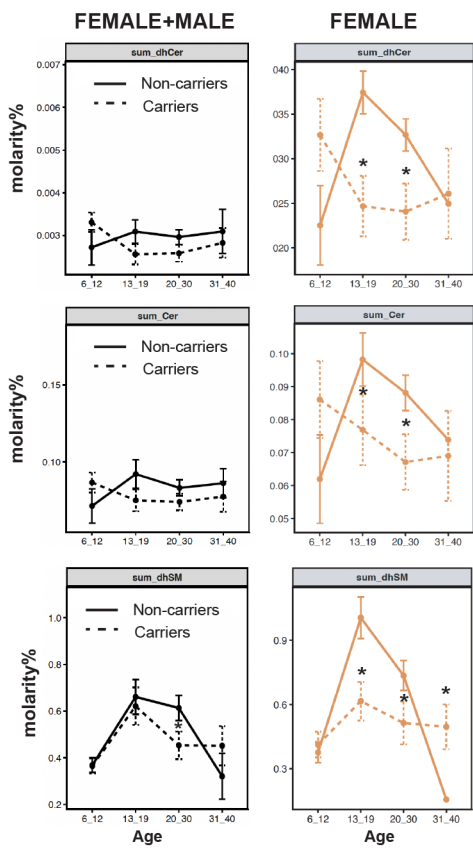

**c.**

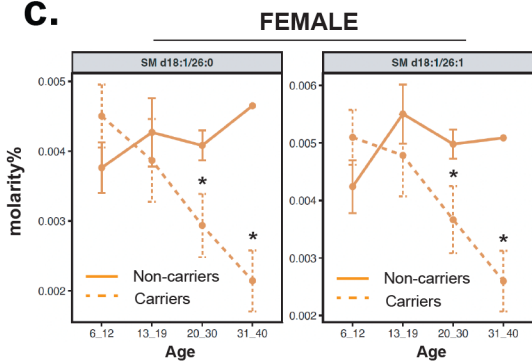

**d.**

Children 6-12 y.o.

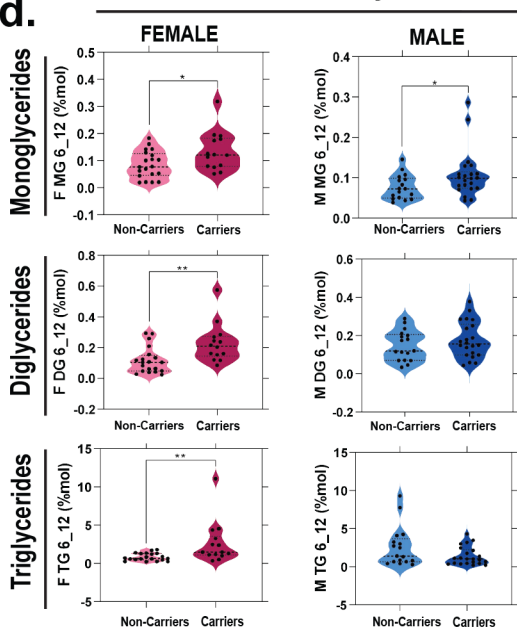

**e.**

Children 6-12 y.o.

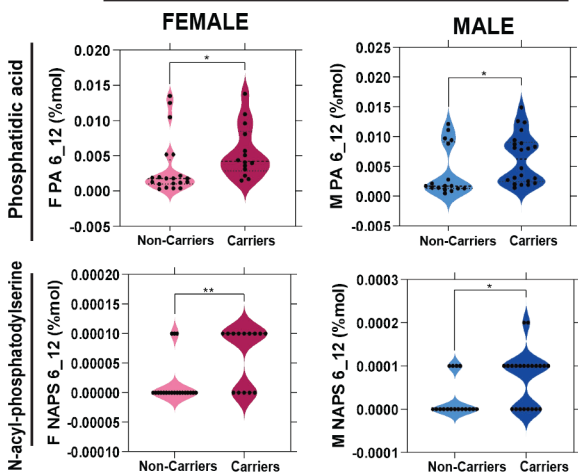

**a.**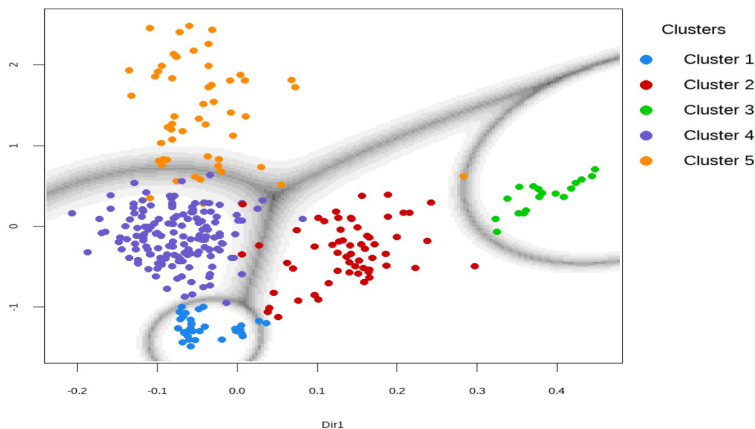**b.**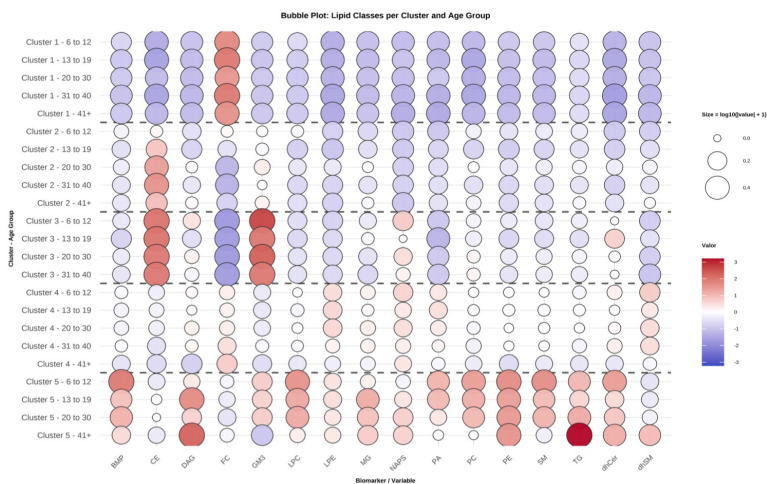**g.**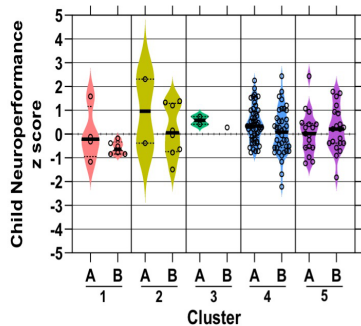**h.**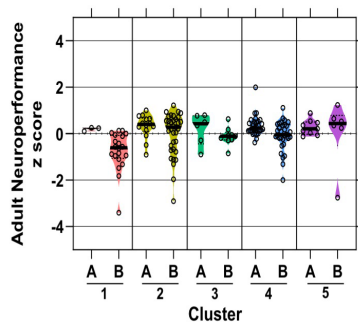**c.**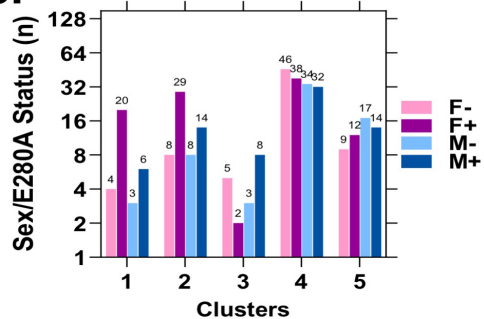**d.**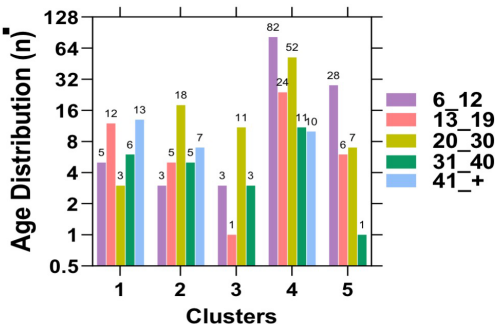**e.**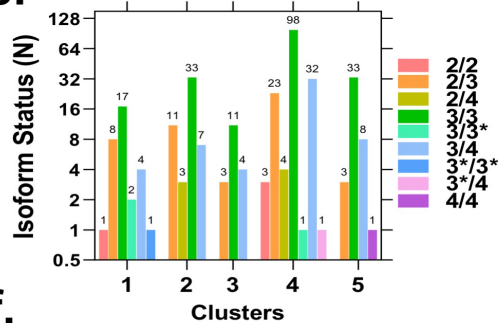**f.**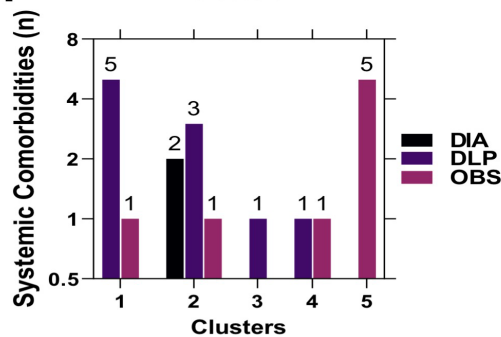

Supplement: Supplementary file 1 [file 3fa2780bbd889b041cff01ad.pdf]
